# Supplementary material
Source: PubMed Central journal article supplement (PMC2912211)

**A**

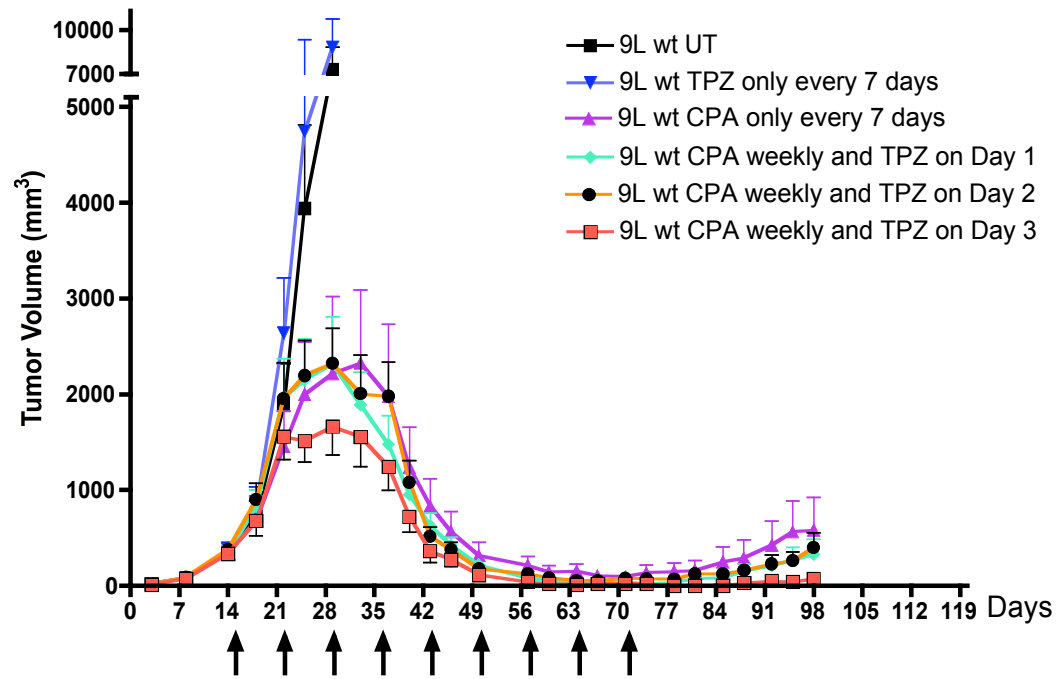

**B**

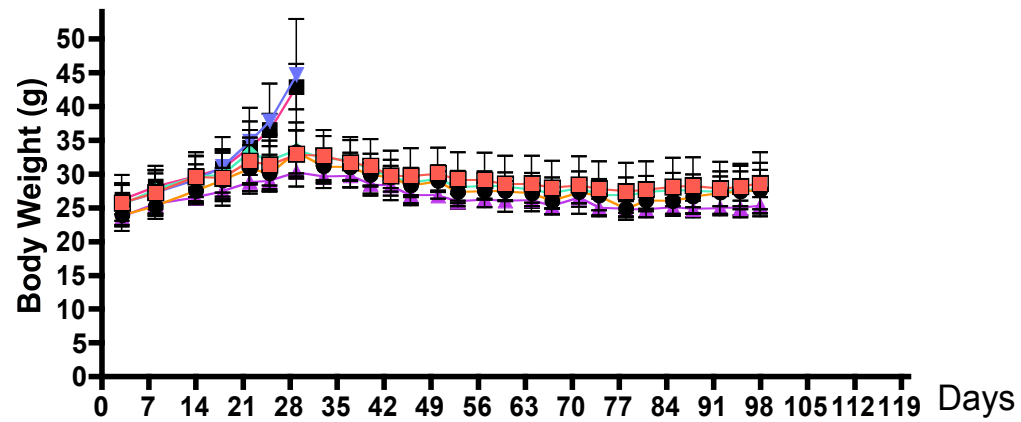

**A**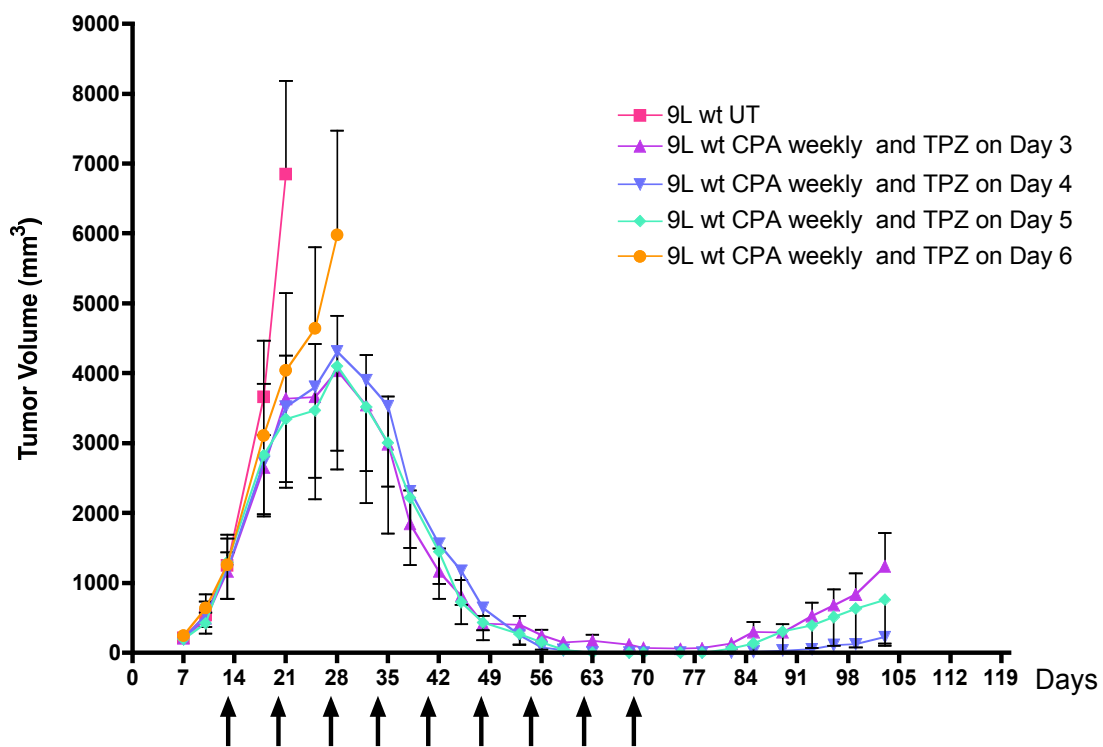**B**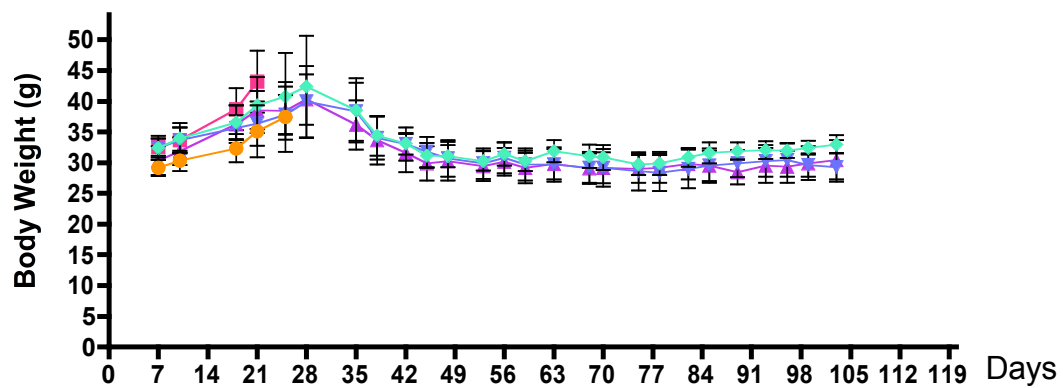

Supplement: NIHMS207467-supplement-Fig_1__Fig_2.pdf [file NIHMS207467-supplement-Fig_1__Fig_2.pdf]
